# Supplementary material
Source: Research Square preprint supplement (doi:10.21203/rs.3.rs-9923789/v1)
Supplement: Supplementary file 1 [file 9dcd8df8975e955363031099.docx]

TableS1 Detailed information of ISNA-associated dysregulated metabolites.

| **No.** | **Metabolites** | ***p* value** | **Fold changea** |
| --- | --- | --- | --- |
| 1 | (10E,12E)-9-hydroxyoctadeca-10,12-dienoic acid | 0.001 | 9.75 |
| 2 | (2-oxo-2,3-dihydro-1H-indol-3-yl)acetic acid | 0.028 | 0.64 |
| 3 | (5xi,9xi,10alpha)-Kaur-16-en-18-oic acid | 0.001 | 13.70 |
| 4 | 1,4-Butynediol | 0.038 | 0.55 |
| 5 | 16-Hydroxyhexadecanoic acid | 0.006 | 2.09 |
| 6 | 1-Methylguanosine | 0.001 | 2.36 |
| 7 | 2-Oxobutyric acid | 0.001 | 0.52 |
| 8 | 2-Phenylacetamide | <0.001 | 0.29 |
| 9 | 3-Hydroxybutanoic acid | 0.038 | 1.57 |
| 10 | 3-Hydroxypyridine | 0.004 | 0.56 |
| 11 | 3-Indoxyl sulfate | 0.006 | 0.19 |
| 12 | 4-[5-[[4-[5-[acetyl(hydroxy)amino]pentylamino]-4-oxobutanoyl]-hydroxyamino]pentylamino]-4-oxobutanoic acid | 0.027 | 1.86 |
| 13 | 4-Cholesten-3-one | <0.001 | 13.72 |
| 14 | 4-Hydroxybenzoate | 0.007 | 0.29 |
| 15 | 4-Hydroxyquinoline | 0.001 | 0.14 |
| 16 | 5-Aminopentanoic acid | 0.009 | 0.51 |
| 17 | 5-Hydroxyindole-3-acetic acid | 0.006 | 1.67 |
| 18 | 5-Methoxypsoralen | 0.019 | 0.65 |
| 19 | 8-(4-Oxo-5-pent-2-enylcyclopent-2-en-1-yl)octanoic acid | <0.001 | 22.28 |
| 20 | 9-Oxooctadeca-10,12-Dienoic Acid | 0.001 | 23.06 |
| 21 | 9-Trans-Palmitelaidic acid | <0.001 | 6.82 |
| 22 | 9Z,12Z-Linoleic acid | 0.003 | 1.74 |
| 23 | Acetylcarnitine | 0.005 | 0.39 |
| 24 | a-Linolenic acid | 0.018 | 2.38 |
| 25 | Allatoin | <0.001 | 0.37 |
| 26 | Anileridine | <0.001 | 4.58 |
| 27 | Arachidonic acid | <0.001 | 3.57 |
| 28 | Arginine | 0.001 | 0.58 |
| 29 | Aspartic acid | 0.022 | 0.53 |
| 30 | Atrazine-desethyl | <0.001 | 0.43 |
| 31 | Azelaic acid | 0.038 | 0.46 |
| 32 | Benzoylcholine | 0.007 | 0.50 |
| 33 | Biliverdin | <0.001 | 2.84 |
| 34 | Caffeine | 0.045 | 1.58 |
| 35 | Choline | <0.001 | 0.63 |
| 36 | Cholylglycine | <0.001 | 8.08 |
| 37 | Citramalic Acid | 0.001 | 0.23 |
| 38 | Citric Acid | <0.001 | 0.48 |
| 39 | Clomazone | <0.001 | 0.00 |
| 40 | Coprostanone | <0.001 | 3.32 |
| 41 | Cystine | <0.001 | 0.52 |
| 42 | D-(+)-Malic acid | 0.021 | 0.63 |
| 43 | D-(+)-Pantothenic acid | <0.001 | 0.36 |
| 44 | D-Alloisoleucine | 0.017 | 0.59 |
| 45 | Decylamine oxide | 0.002 | 0.61 |
| 46 | Diethyltoluamide | <0.001 | 0.43 |
| 47 | Dihydrosphingosine | 0.009 | 2.45 |
| 48 | Dimethyl sulfoxide | 0.006 | 1.85 |
| 49 | Dioctyl Phthalate | <0.001 | 10.13 |
| 50 | DL-Coniine | 0.027 | 0.66 |
| 51 | Pipecolinic acid | <0.001 | 0.47 |
| 52 | Docosatetraenoic acid | <0.001 | 3.39 |
| 53 | Ergothioneine | 0.007 | 0.32 |
| 54 | Ethyl-beta-glucuronide | <0.001 | 0.34 |
| 55 | FA 18:1+1O | 0.049 | 0.62 |
| 56 | FA 18:1+2O | 0.020 | 0.50 |
| 57 | FA 18:1+3O | 0.001 | 0.26 |
| 58 | FA 18:2+O | 0.002 | 0.16 |
| 59 | FA 18:3+1O | 0.030 | 0.49 |
| 60 | FA 18:4+2O | <0.001 | 4.61 |
| 61 | FA 9:1+1O | 0.007 | 0.36 |
| 62 | FA 9:2+1O | 0.004 | 0.15 |
| 63 | Gelomulide N | 0.019 | 0.60 |
| 64 | Gluconic acid | <0.001 | 0.38 |
| 65 | Glucose | 0.003 | 0.66 |
| 66 | Glutamic acid | <0.001 | 2.70 |
| 67 | Glutamine | <0.001 | 0.65 |
| 68 | Glutathione | <0.001 | 0.30 |
| 69 | Glyceric acid | 0.001 | 0.63 |
| 70 | Glycine | 0.005 | 1.87 |
| 71 | Glycochenodeoxycholic acid | <0.001 | 9.93 |
| 72 | Glycocyamine | 0.001 | 3.97 |
| 73 | Glycolic acid | <0.001 | 0.59 |
| 74 | Guanosine | <0.001 | 0.10 |
| 75 | Heptadecanoic acid | 0.028 | 0.65 |
| 76 | Hippuric acid | 0.012 | 1.69 |
| 77 | Histidine | <0.001 | 0.65 |
| 78 | Homocysteine | <0.001 | 0.43 |
| 79 | Indole | <0.001 | 5.67 |
| 80 | Ketamine | <0.001 | 0.00 |
| 81 | Ketoleucine | 0.010 | 0.66 |
| 82 | L-(-)-Phenylalanine | <0.001 | 0.12 |
| 83 | L-(+)-Tartrate | 0.001 | 0.46 |
| 84 | L-5-Oxoproline | <0.001 | 0.37 |
| 85 | Laminine | 0.026 | 0.50 |
| 86 | L-Anserine | <0.001 | 4.11 |
| 87 | Leucylleucine | 0.008 | 0.61 |
| 88 | Lidocaine | <0.001 | 10.04 |
| 89 | Lidocaine N-Oxide | 0.001 | 2.68 |
| 90 | Linoleic acid | 0.003 | 2.27 |
| 91 | LPC 18:1 | 0.001 | 2.53 |
| 92 | LPC 18:3 | 0.001 | 2.61 |
| 93 | LPE 16:0 | 0.004 | 2.54 |
| 94 | LPE 18:1 | 0.008 | 2.05 |
| 95 | L-Proline | <0.001 | 0.60 |
| 96 | L-Tryptophan | 0.010 | 0.38 |
| 97 | Melibiose | <0.001 | 0.26 |
| 98 | Mesaconic acid | 0.010 | 0.60 |
| 99 | Methionine | <0.001 | 1.56 |
| 100 | Monoisobutyl phthalate | <0.001 | 10.59 |
| 101 | Myristic acid | 0.031 | 1.61 |
| 102 | N-(2,6-Dimethylphenyl)-2-Hydroxyacetamide | <0.001 | 0.15 |
| 103 | N-(2,6-Dimethylphenyl)-N2-ethenyl-N2-ethylglycinamide | 0.022 | 0.59 |
| 104 | N,N-Diethyl-4-hydroxybenzamide | 0.016 | 0.58 |
| 105 | N,N-Dimethylarginine | <0.001 | 0.36 |
| 106 | N-Acetyl-5-hydroxytryptamine | <0.001 | 4.79 |
| 107 | Nervonic acid | 0.006 | 0.33 |
| 108 | N-Methyl-2-pyrrolidone | <0.001 | 0.35 |
| 109 | Oxazepam | <0.001 | 0.04 |
| 110 | Palmitoleic acid | <0.001 | 1.93 |
| 111 | Palmitoylcarnitine cation | <0.001 | 2.66 |
| 112 | Pantothenic acid | 0.003 | 1.85 |
| 113 | Pentadecanoic acid | 0.035 | 1.62 |
| 114 | Phenaturic acid | 0.007 | 0.48 |
| 115 | Phthalic anhydride | <0.001 | 4.23 |
| 116 | Phytosphingosine | <0.001 | 0.32 |
| 117 | Piperidine | <0.001 | 9.44 |
| 118 | Proline-hydroxyproline | <0.001 | 0.34 |
| 119 | Propionylcarnitine | 0.001 | 0.05 |
| 120 | Propylparaben | 0.037 | 0.60 |
| 121 | Pyridine | 0.037 | 0.53 |
| 122 | Pyruvic acid | 0.003 | 0.37 |
| 123 | Salicylic acid | 0.001 | 0.21 |
| 124 | Serine | 0.005 | 1.85 |
| 125 | Serotonin | <0.001 | 0.01 |
| 126 | Spermidine | <0.001 | 23.47 |
| 127 | Sphingosine | <0.001 | 9.40 |
| 128 | Temazepam | 0.001 | 4.01 |
| 129 | Theobromine | 0.001 | 3.96 |
| 130 | Thiamine | <0.001 | 0.19 |
| 131 | Thiazolidine-4-carboxylic acid | <0.001 | 0.46 |
| 132 | Threonic acid | <0.001 | 0.39 |
| 133 | Tri-isobutylphosphate | <0.001 | 0.23 |
| 134 | Triphenylphosphine oxide | <0.001 | 0.05 |
| 135 | Tyr | 0.009 | 1.61 |
| 136 | Xanthosine | 0.001 | 3.94 |

a Median fold change of serum metabolites: post-HCD vs. pre-HCD.
